# Supplementary material
Source: PubMed Central journal article supplement (PMC6396296)
Supplement: NIHMS1516140-supplement-1.pdf [file NIHMS1516140-supplement-1.pdf]

**Table S1. Demographic and clinical characteristics of patient cohorts**

| <b>Demographic features</b>             | Patients with RA  | Patients with PsA |
|-----------------------------------------|-------------------|-------------------|
| Number of patients                      | 155               | 33                |
| Age (mean $\pm$ SD, years)              | 56.36 $\pm$ 14.85 | 55.64 $\pm$ 11.14 |
| Female (%)                              | 78.06             | 39.39             |
| <b>Clinical characteristics</b>         |                   |                   |
| Disease duration (mean $\pm$ SD, years) | 7.99 $\pm$ 7.68   | 7.34 $\pm$ 6.33   |
| Active disease (%)                      | 93.55             | 100.0             |
| CDAI (mean $\pm$ SD)                    | 13.23 $\pm$ 9.89  | N/A               |
| Extra-articular manifestations (%)      | 30.97             | N/A               |
| Nodules (%)                             | 9.67              | N/A               |
| <b>Medications (%)</b>                  |                   |                   |
| Untreated at the time of enrollment     | 20.65             | 12.12             |
| DMARD naïve (%)                         | 5.16              | 0                 |
| Corticosteroids                         | 21.29             | 15.15             |
| Methotrexate                            | 45.16             | 39.39             |
| Hydroxychloroquine                      | 21.94             | 0                 |
| TNF inhibitors                          | 23.23             | 30.3              |
| Other DMARDS                            | 25.81             | 24.24             |
